# Supplementary material for: Cu-doped ZnO/Ag/CuO heterostructure: superior photocatalysis and charge transfer
Source: Royal Society of Chemistry journal article supplement (doi:10.1039/d4ra05989a), 2024-01-01
Supplement: d4ra05989a1.pdf [file d4ra05989a1.pdf]

## Cu-doped ZnO/Ag/CuO heterostructure: superior photocatalysis and charge transfer

Abbay Gebretsadik,<sup>a</sup> Bontu Kefale,<sup>a</sup> Chaluma Sori,<sup>a</sup> Dereje Tsegaye,<sup>a</sup> H C Ananda Murthy<sup>\*b†</sup> and Buzuayehu Abebe<sup>\*a</sup>

<sup>a</sup>Department of Applied Chemistry, Adama Science and Technology University, 1888, Adama, Ethiopia

<sup>b</sup>School of Applied Sciences, Papua New Guinea University of Technology, Lae, Morobe Province, 411, Papua New Guinea.

<sup>†</sup>Department of Prosthodontics, Saveetha Dental College & Hospital, Saveetha Institute of Medical and Technical Science (SIMATS), Saveetha University, Chennai 600077, Tamil Nadu, Indi.

### Figures

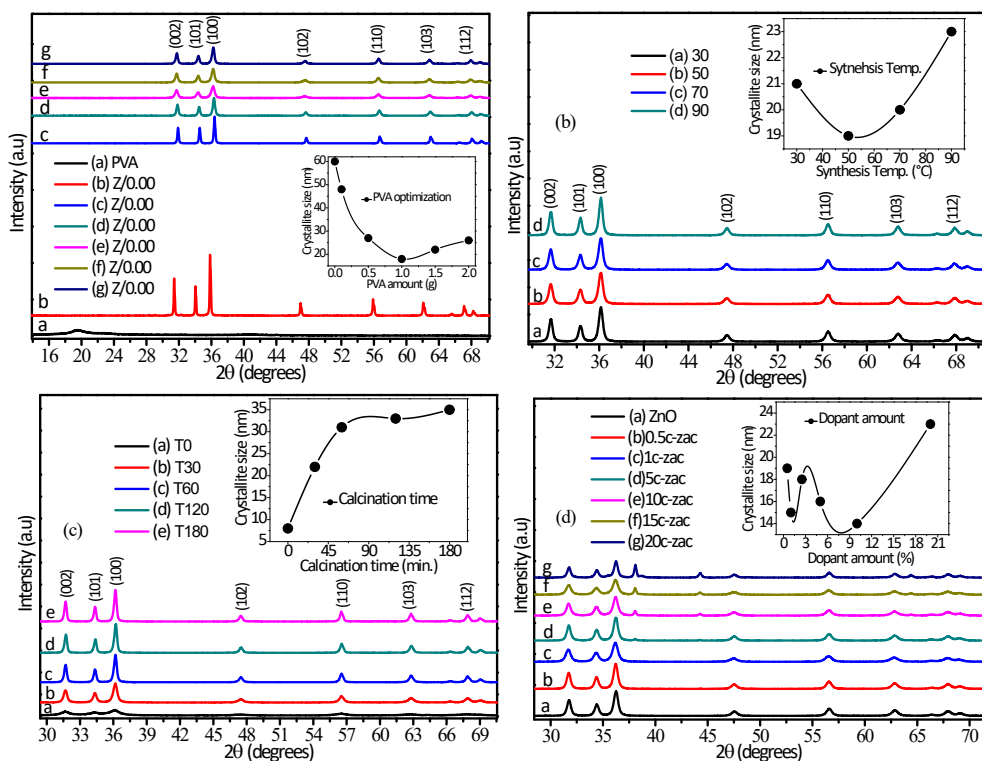

**Fig. S1.** ZnO crystallite size optimization using the X-ray diffraction pattern: (a) the effects of PVA amount, (b) synthesis temperature, (c) Calcination time, (d) dopant amount were studied and optimized. The 1.00 g of PVA, 50 °C synthesis temperature, and 1 hour calcination time were obtained to be the optima.

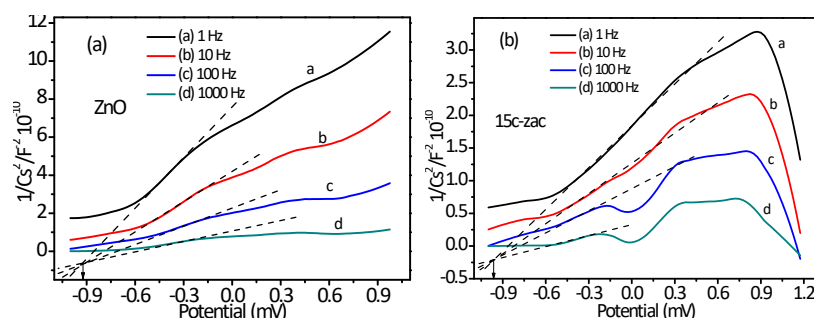

**Fig. S2.** (a and b) Schottky plots of ZnO NPs and c-zac heterostructure, respectively.

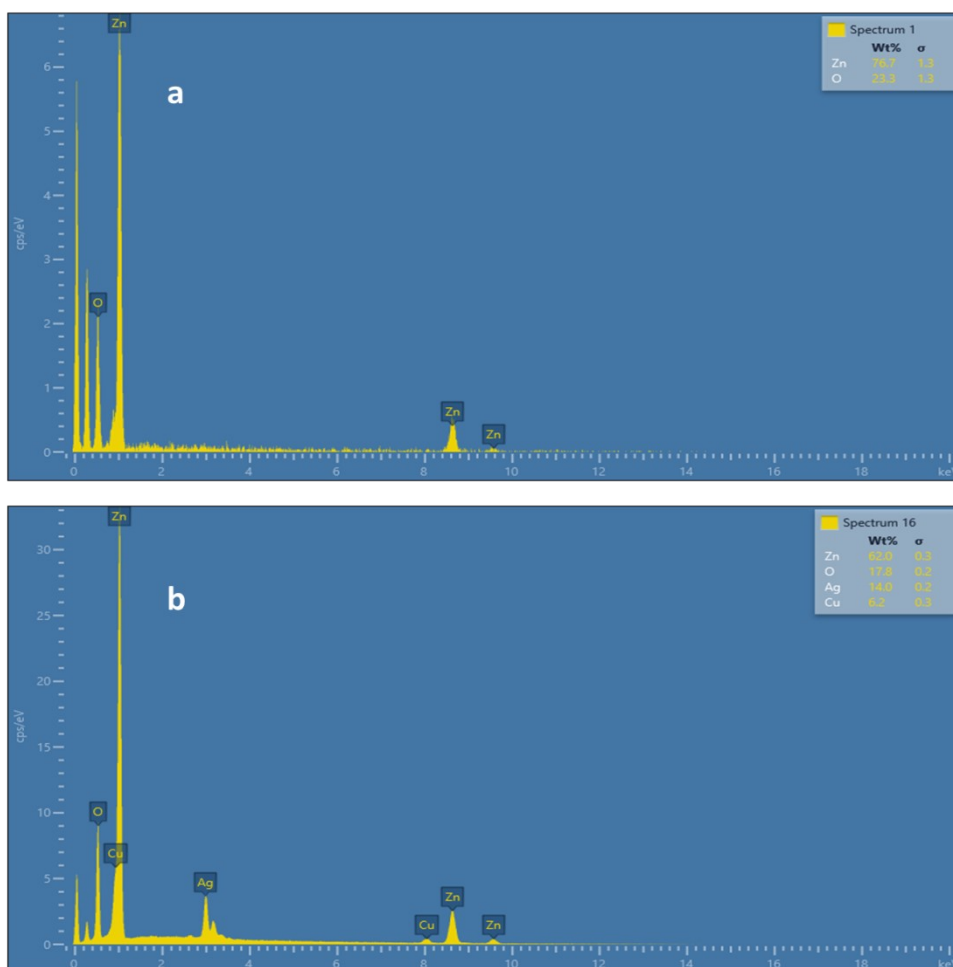

**Fig. S3.** EDX elemental and compositional analysis for (a) ZnO NPs and (b) c-zac heterostructure.

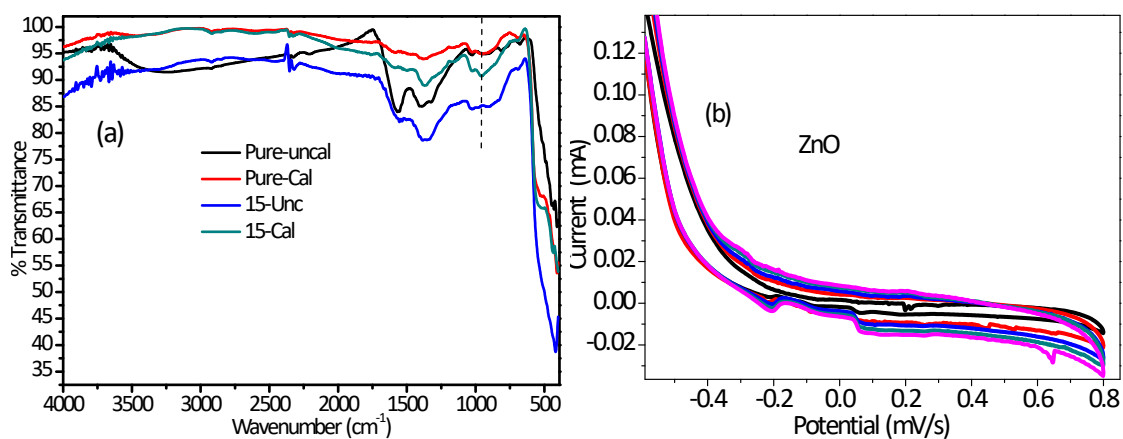

**Fig. S4.** Functional group and metal-oxygen bond properties of uncalcined and calcined ZnO NPs and the c-zac heterostructure. There is a higher wavenumber shift for calcined NPs compared to uncalcined NPs and heterostructure, which is due to the metal-oxygen bond stiffness. The distinctive peak was detected at  $950\text{ cm}^{-1}$  on the c-zac heterostructure, which is from doped CuO, (b) ZnO NP electrochemical analysis using the cyclic voltammetry.

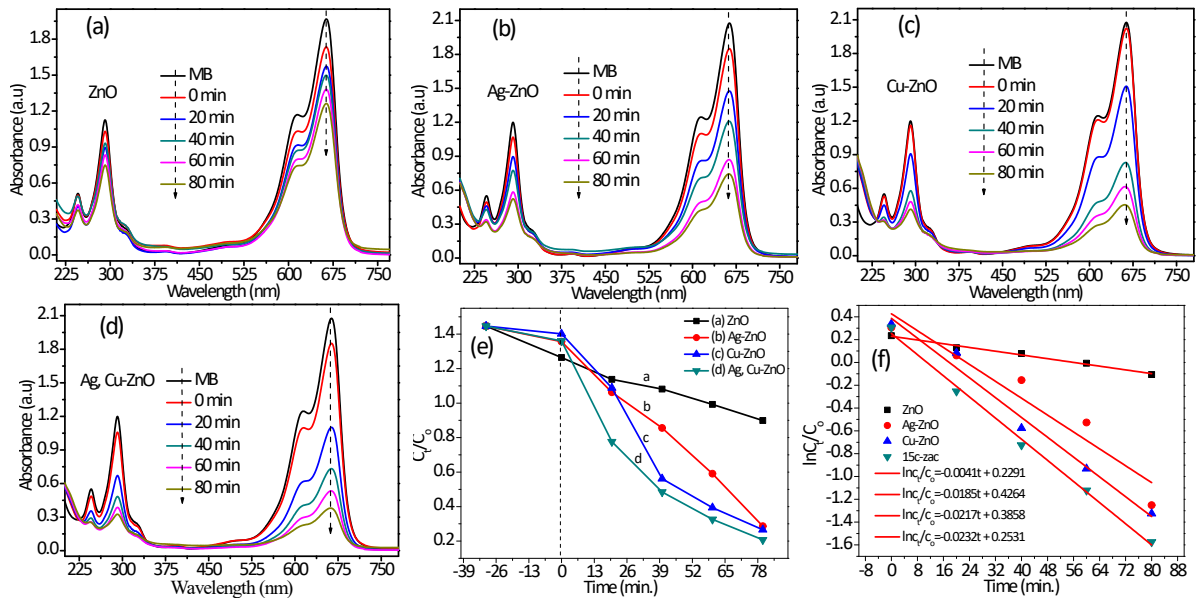

**Fig. S5.** absorbance vs. wavelength plots of (a) ZnO NPs, (b) Ag-ZnO, (c) Cu-ZnO, and (d) c-zac heterostructure at an initial MB concentration of 10 ppm and a catalyst amount of 20 mg, (e and f) the  $C_t/C_0$  and  $\ln C_t/C_0$  versus time plots of the NPs and heterostructures. The c-zac heterostructure has greater photocatalytic performance due to its improved optoelectric properties and synergistic effect.

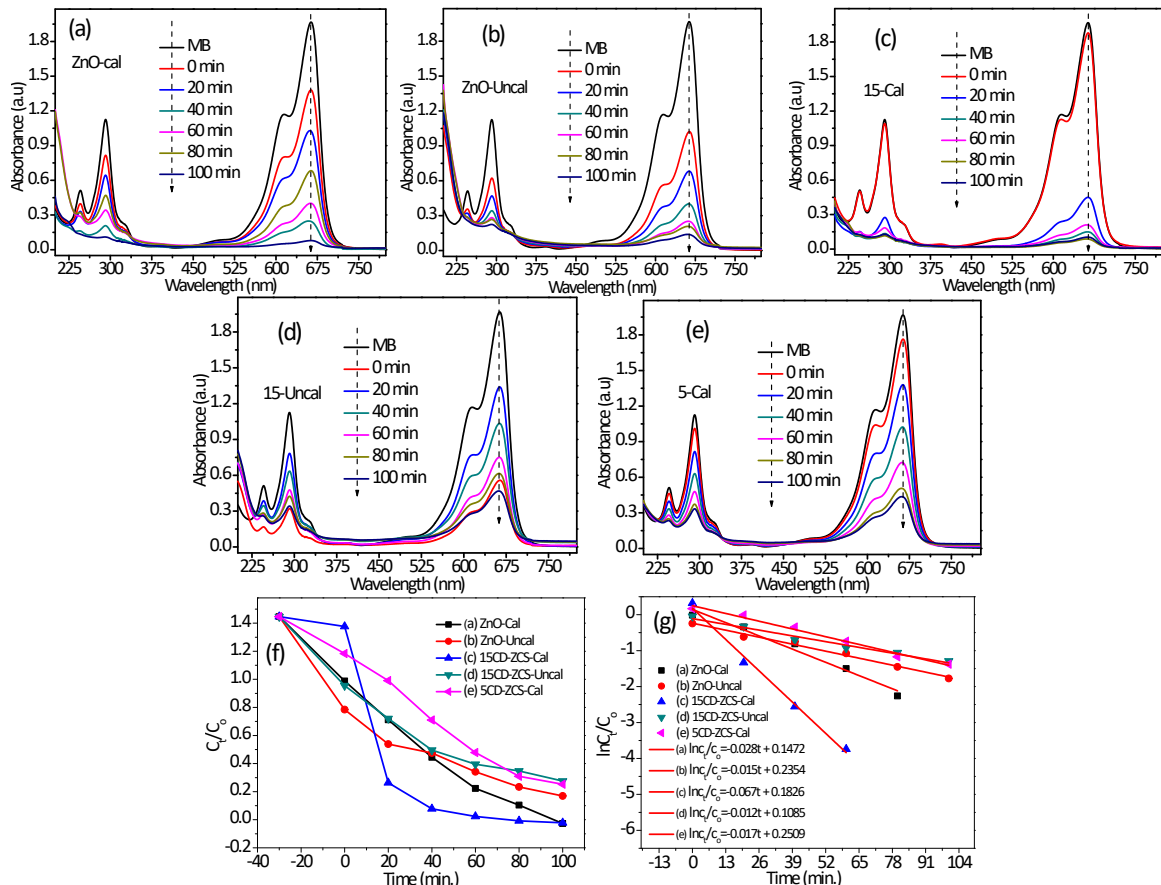

**Fig. S6.** The absorbance vs. wavelength plots of calcined and uncalcined (a and b) ZnO NPs, (c and d) 15c-zac, (e) calcined 5c-zac heterostructures at an initial MB concentration of 10 ppm, a catalyst amount of 20 mg, and a solution pH of 9, (f and g)  $C_t/C_0$  and  $\ln C_t/C_0$  versus time plots of the NPs and heterostructures. A catalyst amount of 20 mg has greater photocatalytic performance. The calcined NPs and heterostructure showed greater photocatalytic performance, probably due to the greater crystallinity effects. However, the 15c-zac heterostructure has greater performance compared to both ZnO NPs and the 5c-zac heterostructure.

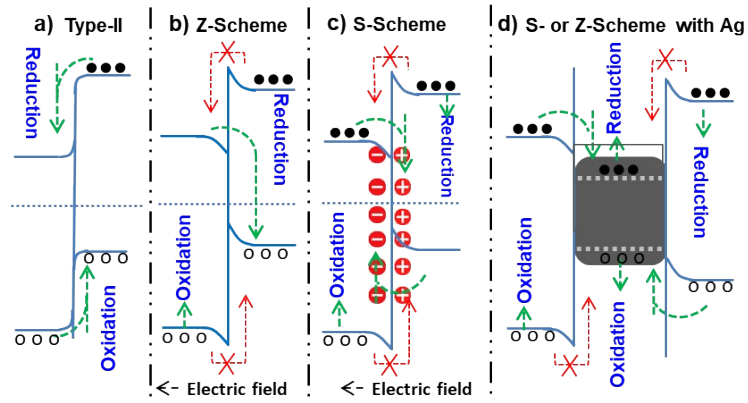

**Fig. S7.** The possible (a) type-II (staggered), (b) Z-Scheme, (c) S-scheme charge transfer mechanisms between CuO and ZnO, (d) Z- or/and S-scheme mechanisms in the presence of silver as a mediator. In Z- and S-scheme mechanisms, electrons and holes with less thermodynamic energy are lost by recombination and quenching. The silver decreases recombination and quenching problems as well as extends visible light absorption.
